# Supplementary material for: Three-dimensional microengineered vascularised endometrium-on-a-chip
Source: PubMed Central journal article supplement — Hum Reprod. 2021 Aug 7;36(10):2720–31. doi: 10.1093/humrep/deab186 (PMC8450871; doi:10.1093/humrep/deab186), 2021-08-07
Supplement: deab186_supplementary_datafigure1.pdf [file deab186_supplementary_datafigure1.pdf]

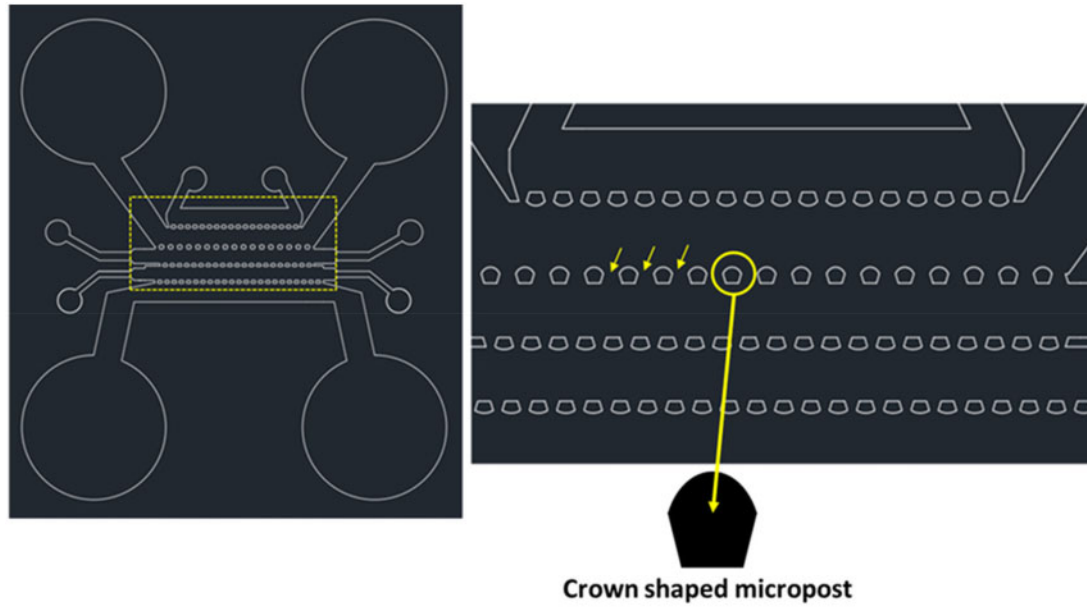

**Supplementary Figure S1.** Computer-aided design (CAD) of microengineered vascularised endometrium-on-a-chip. The microfluidic platform consists of five parallel channels.
