# Supplementary material for: Three-dimensional microengineered vascularised endometrium-on-a-chip
Source: PubMed Central journal article supplement — Hum Reprod. 2021 Aug 7;36(10):2720–31. doi: 10.1093/humrep/deab186 (PMC8450871; doi:10.1093/humrep/deab186), 2021-08-07
Supplement: deab186_supplementary_datafigure3.pdf [file deab186_supplementary_datafigure3.pdf]

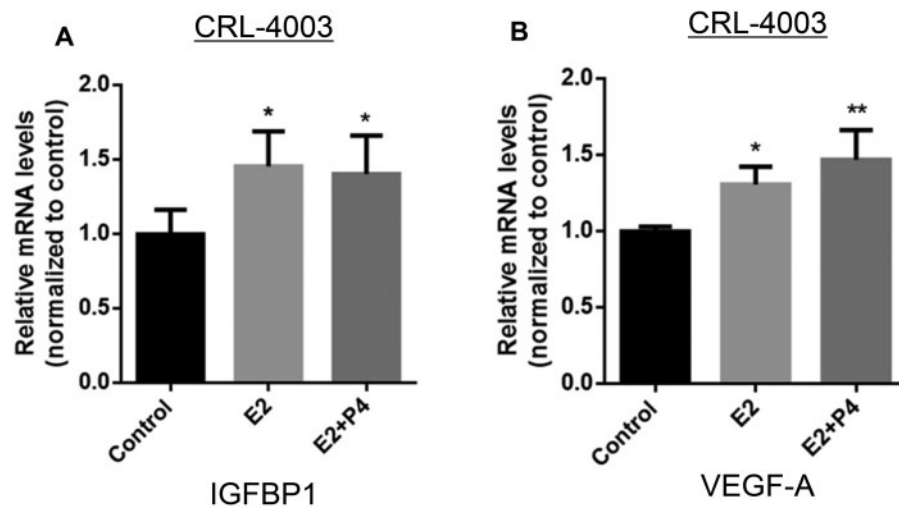

**Supplementary Figure S3.** QRT-PCR analyses of IGFBP1 (A) and VEGF-A (B) in endometrial stromal fibroblast cells (CRL-4003). One-way ANOVA, plotted as mean  $\pm$  SD where \*, and \*\* are for  $P < 0.05$ , and  $0.01$ , respectively.
