# Supplementary material for: Three-dimensional microengineered vascularised endometrium-on-a-chip
Source: PubMed Central journal article supplement — Hum Reprod. 2021 Aug 7;36(10):2720–31. doi: 10.1093/humrep/deab186 (PMC8450871; doi:10.1093/humrep/deab186), 2021-08-07
Supplement: deab186_supplementary_datafigure4.pdf [file deab186_supplementary_datafigure4.pdf]

human reproduction SUPPLEMENTARY DATA

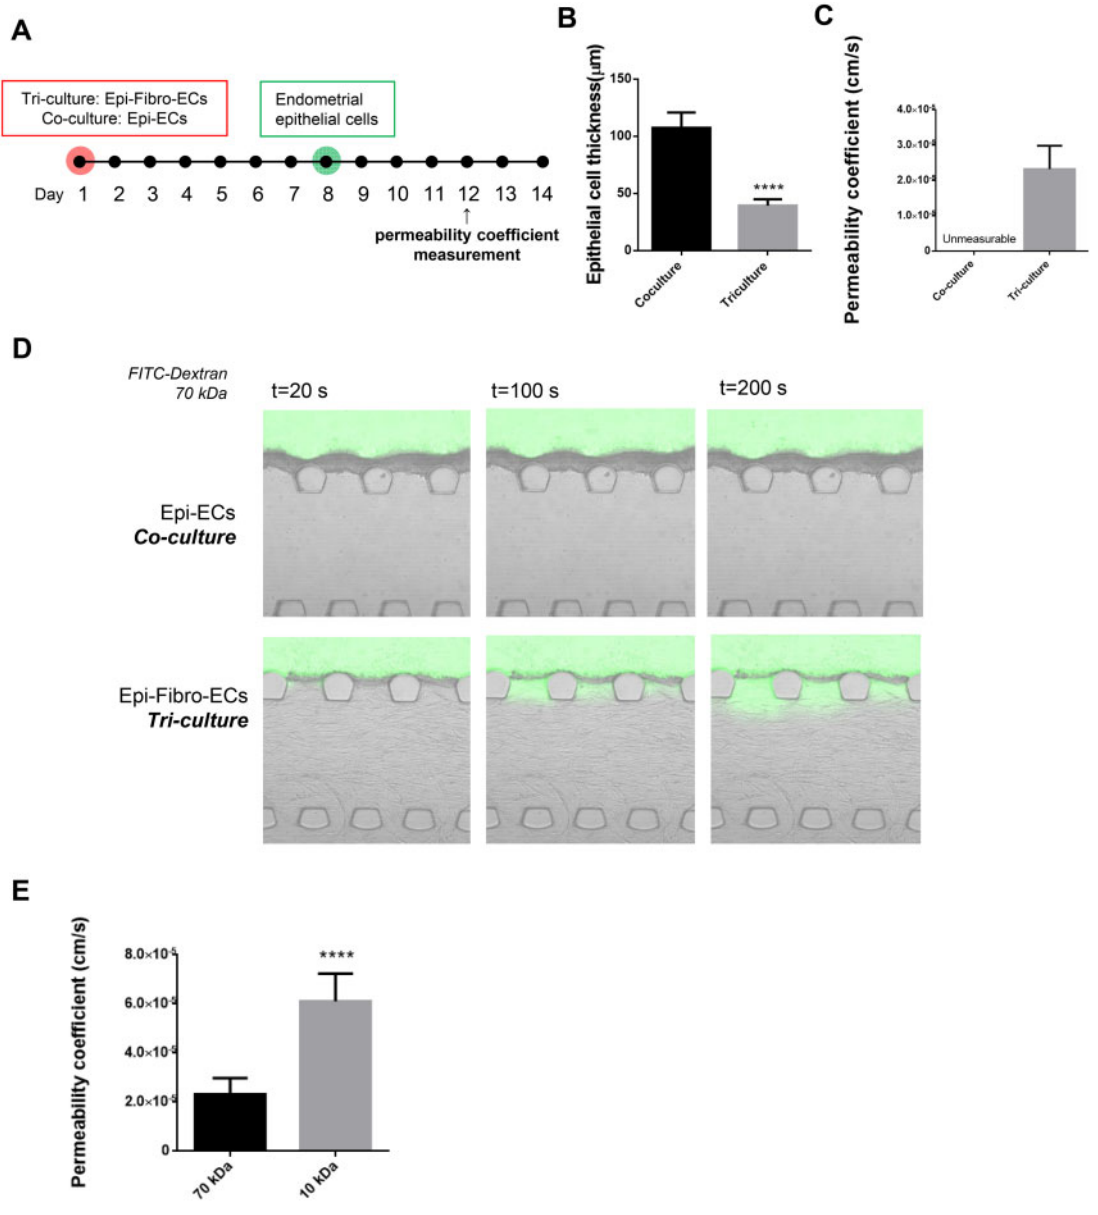

**Supplementary Figure S4. Endometrial permeability measurement with fluorescence micrographs of channel filled with FITC-dextran.** (A) Schematic of experiment process of permeability measurement. (B) Epithelial cell thickness of co-culture (epithelial cell–endothelial cell) and tri-culture (epithelial cell–stromal cell–endothelial cell) condition. (C) Permeability coefficient of co-culture and tri-culture conditions. (D) Time series fluorescence micrographs were taken and analysed for endometrial permeability. (E) Permeability coefficient of tri-culture model for different molecular weights of FITC-dextran. Non-paired Student’s t-test, plotted as mean ± SD where \*\*\*\* is  $P < 0.0001$ .
