# Supplementary material for: Three-dimensional microengineered vascularised endometrium-on-a-chip
Source: PubMed Central journal article supplement — Hum Reprod. 2021 Aug 7;36(10):2720–31. doi: 10.1093/humrep/deab186 (PMC8450871; doi:10.1093/humrep/deab186), 2021-08-07
Supplement: deab186_supplementary_datatable1.pdf [file deab186_supplementary_datatable1.pdf]

**Supplementary Table S1 Primers used for qRT-PCR.**

|        |         |                        |
|--------|---------|------------------------|
| IGFBP1 | Forward | AGGCTCTCCATGTCACCAACA  |
|        | Reverse | CTCCTGATGTCTCCTGTGCCTT |
| VEGF-A | Forward | AGGGCAGAATCATCACGAAGT  |
|        | Reverse | AGGGTCTCGATTGGATGGCA   |
